# Supplementary material
Source: PubMed Central journal article supplement (PMC7313423)
Supplement: NIHMS1596580-supplement-Supplementary_material.pdf [file NIHMS1596580-supplement-Supplementary_material.pdf]

## **Eosinophil-derived IL-13 Promotes Emphysema**

Alfred D. Doyle<sup>1</sup>, Manali Mukherjee<sup>2</sup>, William E. LeSuer<sup>3</sup>, Tyler B. Bittner<sup>3</sup>, Saif M. Pasha<sup>3</sup>, Justin J. Frere<sup>3</sup>, Joseph L. Neely<sup>3</sup>, Jake A. Kloeber<sup>3</sup>, Kelly P. Shim<sup>1,4</sup>, Sergei I. Ochkur<sup>3</sup>, Terence Ho<sup>2</sup>, Benjamin L. Wright<sup>1,4</sup>, Matthew A. Rank<sup>1</sup>, James J. Lee<sup>3\*</sup>, Parameswaran Nair<sup>2</sup>, and Elizabeth A. Jacobsen<sup>3§</sup>

### **ONLINE SUPPLEMENTARY MATERIAL**

**Supplementary Table 1. Multivariate Regression analysis showing MMP-12 as the predictor for presence of emphysema**

| <b>Model Summary</b>                          |                   |                             |                   |                            |                                  |                         |
|-----------------------------------------------|-------------------|-----------------------------|-------------------|----------------------------|----------------------------------|-------------------------|
| Model                                         | R                 | R Square                    | Adjusted R Square | Std. Error of the Estimate | Independent variables            | Method                  |
| 1                                             | 0.361             | 0.13                        | 0.107             | 0.4709                     | IL-13, Eosinophilia, EPX, MMP-12 | Stepwise                |
| <b>Analysis of Variance</b>                   |                   |                             |                   |                            |                                  |                         |
| Model                                         |                   | Sum of Squares              | df                | Mean Square                | F                                | Sig.                    |
| 1                                             | <b>Regression</b> | <b>1.231</b>                | <b>1</b>          | <b>1.231</b>               | <b>5.553</b>                     | <b>0.024</b>            |
|                                               | Residual          | 8.205                       | 37                | 0.222                      |                                  |                         |
|                                               | Total             | 9.436                       | 38                |                            |                                  |                         |
| <b>Coefficient</b>                            |                   |                             |                   |                            |                                  |                         |
| Model                                         |                   | Unstandardized Coefficients |                   | Standardized Coefficients  | t                                | Sig.                    |
|                                               |                   | B                           | Std. Error        | Beta                       |                                  |                         |
| 1                                             | (Constant)        | 0.215                       | 0.112             |                            | 1.924                            | 0.062                   |
|                                               | <b>MMP-12</b>     | <b>0</b>                    | <b>0</b>          | <b>0.361</b>               | <b>2.356</b>                     | <b>0.024</b>            |
| <b>Excluded Variables</b>                     |                   |                             |                   |                            |                                  |                         |
| Model                                         |                   | Beta In                     | t                 | Sig.                       | Partial Correlation              | Collinearity Statistics |
|                                               |                   |                             |                   |                            |                                  | Tolerance               |
| 1                                             | IL-13             | .126b                       | 0.806             | 0.426                      | 0.133                            | 0.967                   |
|                                               | Eosinophil        | -.225b                      | -1.411            | 0.167                      | -0.229                           | 0.903                   |
|                                               | EPX               | -.004b                      | -0.026            | 0.98                       | -0.004                           | 0.842                   |
| a Dependent Variable: Emphysema               |                   |                             |                   |                            |                                  |                         |
| b Predictors in the Model: (Constant), MMP-12 |                   |                             |                   |                            |                                  |                         |

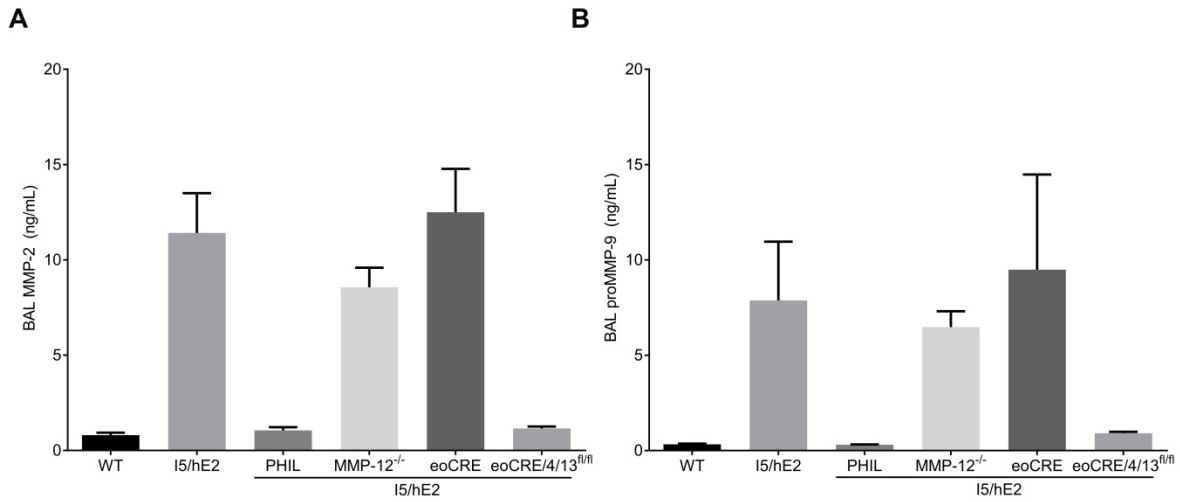

**Supplementary Figure 1. Eosinophil-derived IL-4/13 induces MMP-2 and MMP-9 production in *I5/hE2* mice.** (A) ELISA measurement of MMP-2 in BAL showed MMP-2 in *I5/hE2* mice is dependent on eosinophil-derived IL-4/13. (B) ELISA measurement of proMMP-9 in BAL showed proMMP-9 in *I5/hE2* mice is dependent on eosinophil-derived IL-4/13. n≥3 mice.

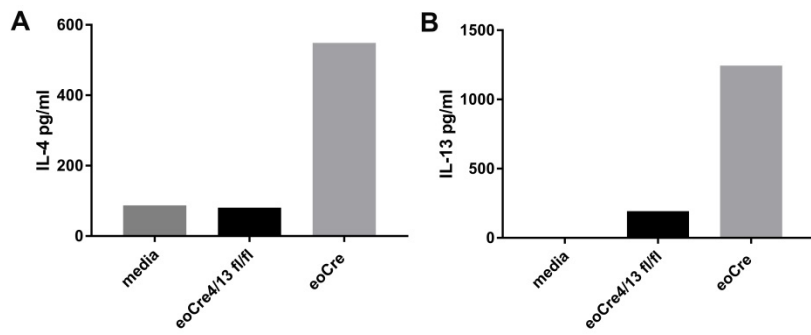

**Supplementary Figure 2. eoCre4/13<sup>fl/fl</sup> mice are significantly reduced in their expression of IL-4 and IL-13.** Eosinophils from NJ.1638 or NJ.1638/eoCre4/13<sup>fl/fl</sup> were purified and then cultured at 1 million/ml for 24 hours with IL-33 (30ng/ml) and GM-CSF (10ng/ml). Supernatants were tested by Multiplex array for cytokine expression.

## **Supplementary Methods**

### *Cell isolation and culture*

Eosinophils were isolated as described previously (1) from ***NJ.1638*** or ***IL-13<sup>-/-</sup>/NJ.1638*** (2, 3) mice and resuspended at  $5 \times 10^6$ /mL in RPMI Glutamax (Invitrogen, Carlsbad, CA) supplemented with 10% FBS (Invitrogen), 50  $\mu$ M beta-mercaptoethanol (Sigma), 10  $\mu$ g/mL penicillin, 10  $\mu$ g/mL streptomycin, 2mM L-glutamine (Life Technologies, Carlsbad, CA), 1mM sodium pyruvate, and 1x MEM non-essential amino acids (Gibco, Thermo Fisher) (RPMI supp.). IL-5 (Peprotech, Rocky Hill, NJ) was added for eosinophil survival to 5ng/mL and IL-33 (Peprotech) was added to activate the eosinophils to 50ng/mL (IL-33 was omitted from the resting eosinophil experimental group). Cells were placed at 37°C, 5%CO<sub>2</sub> and 24 hours later were washed three times to remove added cytokines and resuspended to  $1.5 \times 10^6$ /mL in RPMI supp. + 5ng/mL IL-5. Macrophages were isolated from C57BL/6J or MMP-12<sup>-/-</sup> mice as described by Lasbury et al (4). Briefly, mice were euthanized then BAL was performed with 1ml of sterile saline and placed on ice. The BAL was repeated 10 times per mouse. Collected BAL was pooled and counted for macrophage numbers by morphology on a hemocytometer. Cells were then centrifuged at 300g for 10 min. at 4°C and resuspended in RPMI supp. to 300,000 cells per mL. Cells were then plated at 500  $\mu$ l (150,000 cells) per well in 24 well culture plates (Corning, Corning, NY) and incubated at 37°C, 5%CO<sub>2</sub> for 2 hours. Plates were then washed three times with PBS to remove non-adherent cells. Adherent cells (macrophages) remained in the wells and 500  $\mu$ l RPMI supp. was added to each well. Cells were then cultured for 48 hours with the addition of either eosinophils (750,000 cells) in 500  $\mu$ l RPMI supp. or media alone. To

assess contact dependency the above was performed in transwell plates (0.4µm pore) (Corning).

### **Supplementary References**

1. Jacobsen EA, Zellner KR, Colbert D, Lee NA, Lee JJ. Eosinophils regulate dendritic cells and Th2 pulmonary immune responses following allergen provocation. *J Immunol* 2011; 187: 6059-6068.
2. Lee NA, McGarry MP, Larson KA, Horton MA, Kristensen AB, Lee JJ. Expression of IL-5 in thymocytes/T cells leads to the development of a massive eosinophilia, extramedullary eosinophilopoiesis, and unique histopathologies. *J Immunol* 1997; 158: 1332-1344.
3. McKenzie GJ, Emson CL, Bell SE, Anderson S, Fallon P, Zurawski G, Murray R, Grencis R, McKenzie AN. Impaired development of Th2 cells in IL-13-deficient mice. *Immunity* 1998; 9: 423-432.
4. Lasbury ME, Durant PJ, Lee CH. Numbers of alveolar macrophages are increased during *Pneumocystis pneumonia* in mice. *J Eukaryot Microbiol* 2003; 50 Suppl: 637-638.
